# Supplementary material for: CH4 and N2O Emissions of Undrained and Drained Nutrient-Rich Organic Forest Soil
Source: MDPI journal article supplement (doi:10.3390/f14071390), 2023-07-07
Supplement: s1 [file s1]

**Table S1.** Soil properties in 0 to 20 cm depth.

| Parameter                        | Spruce       | Birch       | Alder        | Clearcut     |
|----------------------------------|--------------|-------------|--------------|--------------|
| Bulk density, kg m <sup>-3</sup> | 415.2 ± 65.9 | 474 ± 76.6  | 405.9 ± 60.7 | 404.6 ± 50.8 |
| pH                               | 4.4 ± 0.5    | 4.4 ± 1.4   | 5.0 ± 1      | 4.1 ± 1      |
| C, g kg <sup>-1</sup>            | 491 ± 68.2   | 430.9 ± 73  | 470.4 ± 56.4 | 515.3 ± 61.6 |
| N, g kg <sup>-1</sup>            | 24.7 ± 3.3   | 25.9 ± 8.2  | 27.3 ± 4.6   | 27.2 ± 8.8   |
| C/N                              | 20.7 ± 2.4   | 18.0 ± 5.9  | 17.5 ± 3     | 20.9 ± 9.2   |
| K, g kg <sup>-1</sup>            | 0.4 ± 0.1    | 0.4 ± 0.2   | 0.7 ± 0.4    | 0.6 ± 0.1    |
| Ca, g kg <sup>-1</sup>           | 20.0 ± 3.0   | 17.9 ± 14.2 | 24.9 ± 9.6   | 21.7 ± 18    |
| Mg, g kg <sup>-1</sup>           | 1.9 ± 0.7    | 1.6 ± 1.1   | 2.7 ± 0.8    | 2.1 ± 1.4    |
| P, g kg <sup>-1</sup>            | 1.0 ± 0.3    | 1.7 ± 1.7   | 1.4 ± 0.6    | 1.0 ± 0.5    |
